# Supplementary material for: Effect of pulmonary rehabilitation on lung function and quality of life in pulmonary tuberculosis survivors with post-tuberculosis lung disease: A Systematic review and meta- analysis
Source: Research Square preprint supplement (doi:10.21203/rs.3.rs-7528773/v1), 2025-10-16
Supplement: Supplementary file 1 [file 14cd00b7eca177b9e93998d2.docx]

**Supplementary file1: Search strategy**

| **PubMed search strategy** | **Results retrieved** | |
| --- | --- | --- |
| ((((((((((antimicrobial drug resistances[MeSH Terms])) OR (antiviral drug resistances[MeSH Terms])) OR (drug resistances, microbial[MeSH Terms])) OR (drug resistances, viral[MeSH Terms])) OR (extensively drug resistances[MeSH Terms])) OR (bacterial multidrug resistances[MeSH Terms])) OR (viral multidrug resistances[MeSH Terms])) AND (((((((((((health personnel[MeSH Terms]) OR (Health care workers[MeSH Terms])) OR (community pharmacist[MeSH Terms])) OR (clinical pharmacist[MeSH Terms])) OR (health student, public[MeSH Terms])) OR (medical student[MeSH Terms])) OR (public health practice[MeSH Terms])) OR (Physician[MeSH Terms])) OR (Medical doctors[MeSH Terms])) OR (health professional[MeSH Terms])) OR (community health worker[MeSH Terms]))) AND (((((((((knowledge[MeSH Terms]) OR (understanding[MeSH Terms])) OR (familiarity[MeSH Terms])) OR (Best Practice[MeSH Terms]) OR (attitude[MeSH Terms])) OR (attitude of health personnel[MeSH Terms]))) OR (Behavior[MeSH Terms])) OR (risk factors[MeSH Terms])) OR (Control[MeSH Terms]))) AND (("sub saharan africa"[Text Word] OR "Angola"[Text Word] OR "Benin"[Text Word] OR "Botswana"[Text Word] OR "burkina faso"[Text Word] OR "Burundi"[Text Word] OR "cabo verde"[Text Word] OR "Cameroon"[Text Word] OR "central african republic"[Text Word] OR "Chad"[Text Word] OR "Comoros"[Text Word] OR "Congo"[Text Word] OR "democratic republic congo"[Text Word] OR "cote d ivoire"[Text Word] OR "ivory coast"[Text Word] OR "Djibouti"[Text Word] OR "equatorial guinea"[Text Word] OR "Eritrea"[Text Word] OR "Ethiopia"[Text Word] OR "Gabon"[Text Word] OR "Gambia"[Text Word] OR "Ghana"[Text Word] OR "Guinea"[Text Word] OR "Guinea-Bissau"[Text Word] OR "Kenya"[Text Word] OR "Lesotho"[Text Word] OR "Liberia"[Text Word] OR "Madagascar"[Text Word] OR "Malawi"[Text Word] OR "Mali"[Text Word] OR "Mauritania"[Text Word] OR "Mauritius"[Text Word] OR "Mozambique"[Text Word] OR "Namibia"[Text Word] OR "Niger"[Text Word] OR "Nigeria"[Text Word] OR "Reunion"[Text Word] OR "Rwanda"[Text Word] OR ("sao tome"[Text Word] AND "Principe"[Text Word]) OR "Senegal"[Text Word] OR "Seychelles"[Text Word] OR "sierra leone"[Text Word] OR "Somalia"[Text Word] OR "south africa"[Text Word] OR "Sudan"[Text Word] OR "Swaziland"[Text Word] OR "Tanzania"[Text Word] OR "Togo"[Text Word] OR "Uganda"[Text Word] OR "Zambia"[Text Word] OR "Zimbabwe"[Text Word] OR "east africa"[Text Word] OR "middle africa"[Text Word] OR "southern africa"[Text Word] OR "west africa"[Text Word] OR "central africa"[Text Word] OR "western sahara"[Text Word])) | **117** | |
| **EMBASE Search strategy** | Result retrieved | |
| Embase query: ('antibiotic resistance'/exp OR 'antiviral resistance'/exp OR 'multidrug resistance'/exp) AND (('health care delivery'/exp OR ('delivery' AND 'health' AND 'care') OR 'delivery of health care' OR ('health' AND 'care') OR 'health care') AND 'named groups by occupation'/exp OR 'pharmacist'/exp OR 'public health student'/exp OR 'medical student'/exp OR 'public health service'/exp OR 'physician'/exp OR 'health care personnel'/exp OR 'health auxiliary'/exp) AND ('knowledge'/exp OR 'comprehension'/exp OR 'recognition'/exp OR 'practice guideline'/exp OR 'attitude'/exp OR 'health personnel attitude'/exp OR 'behavior'/exp OR 'risk factor'/exp OR 'control group'/exp) AND ('sub-saharan africa':ti,ab,kw,de,dn,df,mn,tn OR 'angola':ti,ab,kw,de,dn,df,mn,tn OR 'benin':ti,ab,kw,de,dn,df,mn,tn OR 'botswana':ti,ab,kw,de,dn,df,mn,tn OR 'burkina faso':ti,ab,kw,de,dn,df,mn,tn OR 'burundi':ti,ab,kw,de,dn,df,mn,tn OR 'cabo verde':ti,ab,kw,de,dn,df,mn,tn OR 'cameroon':ti,ab,kw,de,dn,df,mn,tn OR 'central african republic':ti,ab,kw,de,dn,df,mn,tn OR 'chad':ti,ab,kw,de,dn,df,mn,tn OR 'comoros':ti,ab,kw,de,dn,df,mn,tn OR 'congo':ti,ab,kw,de,dn,df,mn,tn OR 'democratic republic congo':ti,ab,kw,de,dn,df,mn,tn OR 'cote d ivoire':ti,ab,kw,de,dn,df,mn,tn OR 'ivory coast':ti,ab,kw,de,dn,df,mn,tn OR 'djibouti':ti,ab,kw,de,dn,df,mn,tn OR 'equatorial guinea':ti,ab,kw,de,dn,df,mn,tn OR 'eritrea':ti,ab,kw,de,dn,df,mn,tn OR 'ethiopia':ti,ab,kw,de,dn,df,mn,tn OR 'gabon':ti,ab,kw,de,dn,df,mn,tn OR 'gambia':ti,ab,kw,de,dn,df,mn,tn OR 'ghana':ti,ab,kw,de,dn,df,mn,tn OR 'guinea':ti,ab,kw,de,dn,df,mn,tn OR 'guinea-bissau':ti,ab,kw,de,dn,df,mn,tn OR 'kenya':ti,ab,kw,de,dn,df,mn,tn OR 'lesotho':ti,ab,kw,de,dn,df,mn,tn OR 'liberia':ti,ab,kw,de,dn,df,mn,tn OR 'madagascar':ti,ab,kw,de,dn,df,mn,tn OR 'malawi':ti,ab,kw,de,dn,df,mn,tn OR 'mali':ti,ab,kw,de,dn,df,mn,tn OR 'mauritania':ti,ab,kw,de,dn,df,mn,tn OR 'mauritius':ti,ab,kw,de,dn,df,mn,tn OR 'mozambique':ti,ab,kw,de,dn,df,mn,tn OR 'namibia':ti,ab,kw,de,dn,df,mn,tn OR 'niger':ti,ab,kw,de,dn,df,mn,tn OR 'nigeria':ti,ab,kw,de,dn,df,mn,tn OR 'reunion':ti,ab,kw,de,dn,df,mn,tn OR 'rwanda':ti,ab,kw,de,dn,df,mn,tn OR ('sao tome':ti,ab,kw,de,dn,df,mn,tn AND 'principe':ti,ab,kw,de,dn,df,mn,tn) OR 'senegal':ti,ab,kw,de,dn,df,mn,tn OR 'seychelles':ti,ab,kw,de,dn,df,mn,tn OR 'sierra leone':ti,ab,kw,de,dn,df,mn,tn OR 'somalia':ti,ab,kw,de,dn,df,mn,tn OR 'south africa':ti,ab,kw,de,dn,df,mn,tn OR 'sudan':ti,ab,kw,de,dn,df,mn,tn OR 'swaziland':ti,ab,kw,de,dn,df,mn,tn OR 'tanzania':ti,ab,kw,de,dn,df,mn,tn OR 'togo':ti,ab,kw,de,dn,df,mn,tn OR 'uganda':ti,ab,kw,de,dn,df,mn,tn OR 'zambia':ti,ab,kw,de,dn,df,mn,tn OR 'zimbabwe':ti,ab,kw,de,dn,df,mn,tn OR 'east africa':ti,ab,kw,de,dn,df,mn,tn OR 'middle africa':ti,ab,kw,de,dn,df,mn,tn OR 'southern africa':ti,ab,kw,de,dn,df,mn,tn OR 'west africa':ti,ab,kw,de,dn,df,mn,tn OR 'central africa':ti,ab,kw,de,dn,df,mn,tn OR 'western sahara':ti,ab,kw,de,dn,df,mn,tn)neural network*':ti,ab,kw) AND ('clinical decision support system'/exp OR 'clinical decision support':ti,ab,kw OR 'cds':ti,ab,kw OR 'decision support':ti,ab,kw OR 'point-of-care':ti,ab,kw OR 'point of care':ti,ab,kw OR 'real-time':ti,ab,kw OR 'realtime':ti,ab,kw OR 'bedside':ti,ab,kw) | [**435**](https://www-embase-com.proxy.library.emory.edu/) | |
| **Google scholar** | Result retrieved | |
| ("antimicrobial resistance" OR "antibiotic resistance" OR AMR) AND ("health personnel" OR "health professionals" OR "healthcare workers" OR "health care workers" OR nurses OR pharmacists OR physicians OR "community health workers") AND (knowledge OR attitudes OR practices OR KAP OR behavior OR behaviour OR prevention OR control OR stewardship) AND ("Angola" OR "Benin" OR "Botswana" OR "Burkina Faso" OR "Burundi" OR "Cabo Verde" OR "Cape Verde" OR "Cameroon" OR "Central African Republic" OR "Chad" OR "Comoros" OR "Congo" OR "Congo-Brazzaville" OR "Democratic Republic of the Congo" OR "DRC" OR "Côte d'Ivoire" OR "Ivory Coast" OR "Djibouti" OR "Equatorial Guinea" OR "Eritrea" OR "Eswatini" OR "Swaziland" OR "Ethiopia" OR "Gabon" OR "Gambia" OR "Ghana" OR "Guinea" OR "Guinea-Bissau" OR "Kenya" OR "Lesotho" OR "Liberia" OR "Madagascar" OR "Malawi" OR "Mali" OR "Mauritania" OR "Mauritius" OR "Mozambique" OR "Namibia" OR "Niger" OR "Nigeria" OR "Rwanda" OR "Sao Tome and Principe" OR "São Tomé and Príncipe" OR "Senegal" OR "Seychelles" OR "Sierra Leone" OR "Somalia" OR "South Africa" OR "South Sudan" OR "Sudan" OR "Tanzania" OR "Togo" OR "Uganda" OR "Zambia" OR "Zimbabwe") | [**7210**](https://www-embase-com.proxy.library.emory.edu/) | |
| **Web of Science Search strategy** | | Result retrieved |
| TS=("drug resistance" OR "antimicrobial resistance" OR "antibiotic resistance" OR "drug resistance, multiple" OR "multiple drug resistance" OR "drug resistance, viral" OR "drug resistance, bacterial") AND TS=("health personnel" OR "healthcare workers" OR "health workers" OR "pharmacists" OR "public health students" OR "medical students" OR "community health workers" OR "physicians" OR "healthcare providers" OR "healthcare professionals") AND TS=("knowledge" OR "attitude" OR "practice" OR "KAP" OR "awareness" OR "behavior" OR "perceptions" OR "risk factors" OR "guideline adherence" OR "guidelines" OR "compliance") AND TS=("sub-Saharan Africa" OR "Angola" OR "Benin" OR "Botswana" OR "Burkina Faso" OR "Burundi" OR "Cabo Verde" OR "Cameroon" OR "Central African Republic" OR "Chad" OR "Comoros" OR "Congo" OR "Democratic Republic of Congo" OR "Cote d'Ivoire" OR "Ivory Coast" OR "Djibouti" OR "Equatorial Guinea" OR "Eritrea" OR "Ethiopia" OR "Gabon" OR "Gambia" OR "Ghana" OR "Guinea" OR "Guinea-Bissau" OR "Kenya" OR "Lesotho" OR "Liberia" OR "Madagascar" OR "Malawi" OR "Mali" OR "Mauritania" OR "Mauritius" OR "Mozambique" OR "Namibia" OR "Niger" OR "Nigeria" OR "Reunion" OR "Rwanda" OR "Sao Tome and Principe" OR "Senegal" OR "Seychelles" OR "Sierra Leone" OR "Somalia" OR "South Africa" OR "Sudan" OR "Swaziland" OR "Tanzania" OR "Togo" OR "Uganda" OR "Zambia" OR "Zimbabwe" OR "East Africa" OR "Middle Africa" OR "Southern Africa" OR "West Africa" OR "Central Africa" OR "Western Sahara")AND TS=("clinical decision support" OR CDS OR "decision support system*" OR "point-of-care" OR "point of care" OR bedside OR "real time" OR realtime) | | [**282**](https://www-embase-com.proxy.library.emory.edu/) |
| **CINAHL Search strategy** | | Result retrieved |
| TX (MH "Drug Resistance, Bacterial+" OR MH "Drug Resistance, Microbial+" OR MH "Drug Resistance, Multiple+" OR MH "Drug Resistance, Viral+" OR TX "antimicrobial resistance" OR TX "drug resistance" OR TX "multiple drug resistance")AND(MH "Health Personnel+" OR MH "Pharmacists" OR MH "Public Health Students" OR MH "Medical Students" OR MH "Community Health Workers" OR MH "Physicians" OR MH "Healthcare Providers" OR MH "Occupational Groups" OR TX "health workers" OR TX "healthcare personnel" OR TX "health professionals")AND(MH "Knowledge" OR MH "Attitude of Health Personnel" OR MH "Guideline Adherence" OR MH "Behavior" OR MH "Comprehension" OR MH "Risk Factors" OR TX "knowledge" OR TX "attitude" OR TX "practice" OR TX "behavior" OR TX "KAP study" OR TX "guidelines" OR TX "compliance")AND(TX "Sub-Saharan Africa" OR TX "Africa South of the Sahara" OR TX "Angola" OR TX "Benin" OR TX "Botswana" OR TX "Burkina Faso" OR TX "Burundi" OR TX "Cabo Verde" OR TX "Cameroon" OR TX "Central African Republic" OR TX "Chad" OR TX "Comoros" OR TX "Congo" OR TX "Democratic Republic of Congo" OR TX "Cote d'Ivoire" OR TX "Ivory Coast" OR TX "Djibouti" OR TX "Equatorial Guinea" OR TX "Eritrea" OR TX "Ethiopia" OR TX "Gabon" OR TX "Gambia" OR TX "Ghana" OR TX "Guinea" OR TX "Guinea-Bissau" OR TX "Kenya" OR TX "Lesotho" OR TX "Liberia" OR TX "Madagascar" OR TX "Malawi" OR TX "Mali" OR TX "Mauritania" OR TX "Mauritius" OR TX "Mozambique" OR TX "Namibia" OR TX "Niger" OR TX "Nigeria" OR TX "Reunion" OR TX "Rwanda" OR TX "Sao Tome and Principe" OR TX "Senegal" OR TX "Seychelles" OR TX "Sierra Leone" OR TX "Somalia" OR TX "South Africa" OR TX "Sudan" OR TX "Swaziland" OR TX "Tanzania" OR TX "Togo" OR TX "Uganda" OR TX "Zambia" OR TX "Zimbabwe" OR TX "East Africa" OR TX "Middle Africa" OR TX "Southern Africa" OR TX "West Africa" OR TX "Central Africa" OR TX "Western Sahara") | | [**10**](https://www-embase-com.proxy.library.emory.edu/) |
| **Cochrane Central registral library** | | Result |
| (tuberculosis* OR "post-tuberculosis" OR "post TB" OR PTLD OR "tuberculosis survivor*" OR "tuberculosis sequela*") AND ("pulmonary rehabilitation" OR "respiratory rehabilitation" OR rehab* OR "exercise therapy" OR "exercise training" OR "breathing exercise*" OR "inspiratory muscle training" OR IMT OR "airway clearance" OR "self-management") | | **2** |
| Clinical trial.gov | | Result |
| Post-tuberculosis lung disease  Pulmonary rehabilitation | | **5** |

Results of Begg’s and Egger’s Tests for Publication Bias in KAP Studies

|  |  | | | | |
| --- | --- | --- | --- | --- | --- |
| Outcome | Test type | Bias estimate | Score | P=value | Comment |
| Knowledge | Beggs | 156.00 | Z=1.58 | 0.1146 | No publication bias |
| Egger’s | 3.774 | t=1.55 | 0.1289 | No publication bias |
| Attitude | Beggs | 102.00 | Z=3.31 | 0.0009 | likely publication bias |
| Egger’s | 10.3150 | t=3.76 | 0.0014 | likely publication bias |
| Practice | Beggs | -23.00 | Z= -1.14 | 0.2550 | No statistically significant evidence of publication bias |
| Egger’s | -4.82 | T= -1.21 | 0.2464 | No statistically significant evidence of publication bias |

| Prepost study design | | | | | | | | | | | | | RCT | | Cohort study | |
| --- | --- | --- | --- | --- | --- | --- | --- | --- | --- | --- | --- | --- | --- | --- | --- | --- |
| **Criterion** | Silva et al.2025 | Fonseca et al.2025 | Sinha et al.2025 | Mtei et al.2025 | Hussain et al.2023 | Fernandez et al. 2022 | Tolba et al.2021 | Visca et al. 2019 | Jones et al. 2017 | Ando et al.2003 | Atsuhiko et al. 2002 | Khurana et al. 2020 | **Criterion** | Orooj et al.2023 | **Criterion** | Singh et al.2018 |
| Study question/objective clearly stated | Y | Y | Y | Y | Y | Y | Y | Y | Y | Y | Y | Y | Study described as RCT | Y | Research question/objective clearly stated | Y |
| Eligibility/selection criteria prespecified | Y | Y | Y | Y | Y | Y | Y | Y | Y | Y | Y | Y | Method of randomization adequate | Y | Study population clearly specified and defined | Y |
| Participants representative of target population | Y | N | Y | Y | Y | N | N | N | N | N | N | N | Allocation concealed | Y | Participation rate ≥50% | N |
| All eligible participants enrolled | Y | Y | N | N | N | N | N | N | N | Y | Y | N | Participants/providers blinded | N | Subjects selected from similar populations | Y |
| Sample size sufficiently large | N | N | Y | Y | N | N | N | N | N | N | N | N | Outcome assessors blinded | NR | Sample size justification/power provided | N |
| Intervention clearly described & consistent | Y | Y | Y | Y | Y | Y | Y | Y | Y | Y | Y | Y | Groups similar at baseline | Y | Exposure measured prior to outcome | Y |
| Outcome measures prespecified, valid, reliable | Y | Y | Y | Y | Y | Y | Y | Y | Y | Y | Y | Y | Overall drop-out ≤20% | Y | Timeframe sufficient to observe outcome | Y |
| Outcome assessors blinded | NR | NR | NR | N | NR | NR | N | NR | N | N | N | NR | Differential drop-out ≤15% | Y | Different exposure levels examined | N |
| Loss to follow-up ≤20% | Y | Y | Y | Y | N | Y | Y | Y | Y | Y | Y | Y | High adherence to protocols | Y | Exposure measures clearly defined/valid | Y |
| Statistical methods examined pre–post changes | Y | Y | Y | Y | Y | Y | Y | Y | N | Y | Y | Y | Other interventions avoided or similar | Y | Exposure assessed more than once | Y |
| Outcome measures taken multiple times (ITS) | N | N | N | N | N | N | N | N | N | N | N | N | Outcomes assessed validly & consistently | Y | Outcome measures clearly defined/valid | Y |
| Group-level intervention analyzed correctly | NA | NA | NR | N | NR | NA | NA | NR | N | NA | NA | NR | Sample size sufficiently large | Y | Outcome assessors blinded | N |
| Over all score | 0.82 | 0.64 | 0.82 | 0.67 | 0.6 | 0.64 | 0.55 | 0.6 | 0.42 | 0.67 | 0.67 | 0.6 | Outcomes/subgroups prespecified | Y | Loss to follow-up ≤20% | Y |
|  | High | Moderate | High | Moderate | Moderate | Moderate | Moderate | Moderate | Poor | Moderate | Moderate | Moderate | All randomized participants analyzed (ITT) | Y | Key confounders measured and adjusted | N |
|  |  |  |  |  |  |  |  |  |  |  |  |  |  | o.92 | 0.64 |  |
|  |  |  |  |  |  |  |  |  |  |  |  |  |  | High | Poor |  |
