# Supplementary material for: Effect of pulmonary rehabilitation on lung function and quality of life in pulmonary tuberculosis survivors with post-tuberculosis lung disease: A Systematic review and meta- analysis
Source: Research Square preprint supplement (doi:10.21203/rs.3.rs-7528773/v1), 2025-10-16
Supplement: Supplementary file 2 [file 5337151dbabcaeb1ca6fd841.xlsx]

## Sheet: Table 1
Study characterstics													6 minues walk distance covered				FEV1				FVC				FEV1/FVC				PaO2				SGRQ				SF-36 questionnaire		CRQ		CCQ		ISWT		Hemoptisis		Chest Pain
ID	Author_Year	Year	Country	Study_Design	Seting	Intervention	Partisipant TB history	Age	Intervention duration	Intervention frequency	Sample size	Quality	mean_b_I	sd_b_I	mean_e_I	sd_e_I	mean_b_I	sd_b_I	mean_e_I	sd_e_I	mean_b_I	sd_b_I	mean_e_I	sd_e_I	mean_b_I	sd_b_I	mean_e_I	sd_e_I	mean_b_I	sd_b_I	mean_e_I	sd_e_I	mean_b_I	sd_b_I	mean_e_I	sd_e_I	bl	el	bl	el	bl	el	bl	el	bl	el
1	Silva et al.2025	2025	Brazil, Italy, France	Prospective interventional	Outpatient reference centers	Comprehensive PRP (5 weeks)	Cured or treatment success	61.7 ±12.8)	5	≥15 sessions over 5 weeks	85	High	367.5	132.9	425.9	135.6	1.33	0.85	1.56	0.93	2.37	0.92	2.61	1.03	59.2	23.5	62.3	20.9	66.2	15.1	70.2	13.9	37.5	58	22.4	48.6
2	Fonseca et al.2025	2025	Brazil	Pre-post intervention study(quisi-experemental)	out patient department of the hospital setting		Priviosly TB treated individual with respiratory symptom	17-69	12	5 times a week	23	Moderate	NA	NA	NA	NA	NA	NA	NA	NA	NA	NA	NA	NA	NA	NA	NA	NA	NA	NA	NA	NA	NA	NA	NA	NA
3	Sinha et al.2025	2025	India	Pre-post intervention study	Multicentre (5 centres), Home-based	PR with telephonic follow-up	Post-treatment	48.53 ±15.33	12	Home-based, telephonic follow up 3x/week	260	High	364.1	146.1	395.1	157.7	NA	NA	NA	NA	NA	NA	NA	NA	NA	NA	NA	NA	NA	NA	NA	NA	NA	NA	NA	NA											0.22	0.1
4	Mtei et al.2025	2025	Tanzania	Prospective interventional	Community-based	Community-based PR led by TB survivors	Cured	48 ±8.67	24	4 days per week	121	Moderate	420	87.3	460	61.96	NA	NA	NA	NA	NA	NA	NA	NA	NA	NA	NA	NA	NA	NA	NA	NA	34.63	17.03	12.99	9.69									21 (8)	21 (9)
5	Orooj et al.2023	2023	India	RCT	Outpatient	Pulmonary Rehabilitation	Completed Treatment	35.20 ±11.69	4	4 supervised sessions per week	45	High	286.85	44.64	484.15	48.01	1.29	0.44	1.44	0.64	1.64	0.47	1.64	0.47	NA	NA	NA	NA	100.37	16	100.37	16	NA	NA	NA	NA
6	Hussain et al.2023	2023	India	Pre-post intervention study	Hospital based	Pulmonary Rehabilitation	Post-treatment	50	6	Twice a week	26	Moderate	408.6	108.3	442.7	107.5	NA	NA	NA	NA	NA	NA	NA	NA	NA	NA	NA	NA	NA	NA	NA	NA	57.6	20.1	40.4	18.3
7	Fernandez et al. 2022	2022	Philippines	Pre-post intervention study	Outpatient	Pulmonary rehabilitation program (PRP)	Completed treatment	Not reported	4	Twice a week	14	Moderate	355.5	94.9	470.1	76.9	NA	NA	NA	NA	NA	NA	NA	NA	NA	NA	NA	NA	NA	NA	NA	NA	39	18.8	25	12.6
8	Tolba et al.2021	2021	Egypt	Prospective interventional	Hospital	Pulmonary Rehabilitation (exercise, IMT, education)	Cured	52.4 ±5.61	3	Three times weekly	30	Moderate	411.16	134.49	600.3	168.9	NA	NA	NA	NA	NA	NA	NA	NA	NA	NA	NA	NA	NA	NA	NA	NA	NA	NA	NA	NA
9	Visca et al. 2019	2019	Italy	Pre-post intervention study	Reference center	Comprehensive pulmonary rehabilitation	Successfully treated	75 (median)	8	Five times per week	34	Moderate	371	127.5	406	133.5	1	0.72	1.133	0.73	2.3	0.9	2.4	0.9	51.4	15.1	52.4	14.8	NA	NA	NA	NA	NA	NA	NA	NA
10	Singh et al.2018	2018	India	Prospective cohort study	Outpatient clinic, tertiary care center	Pulmonary Rehabilitation	Post-treatment (finished anti-tubercular therapy)	48 (median)	6	Three days a week	29	Low	488	110.13	526	81.25	1.02	0.32	1.07	0.33	1.76	0.54	1.81	0.56	60.98	16.37	60.55	15.26	NA	NA	NA	NA	NA	NA	NA	NA
11	Jones et al. 2017	2017	Uganda	Pre-pst interventional study	Outpatient	Pulmonary Rehabilitation	Post-treatment	45 ±13	6	Twice weekly	29	Low	NA	NA	NA	NA	1.4	0.54	1.42	0.54	2.08	0.6	2.13	0.61	68	19	67	19	NA	NA	NA	NA	NA	NA	NA	NA							312.41	402.41	4/29 (17%)	2/29 (7%)	13/29 (45%)	7/29 (24%)
12	Ando et al.2003	2003	Japan	Prospective interventional	Outpatient	Pulmonary Rehabilitation	Post-TB sequelae	71 ±5	9	Once weekly	32	Moderate	342	77	384	62	0.84	0.29	0.86	0.087	2.08	0.6	2.13	0.61	NA	NA	NA	NA	78.5	9.6	79	9	NA	NA	NA	NA							299		0.138	0.069	0.45	0.31
13	Atsuhiko et al. 2002	2002	japan	Pre-post intervention study	NR	relaxation, breathing retraining, exercise training, respiratory muscle training	Completed and presented with Complication	39	6	NR	29	Moderate	303	106.3	339	103.3	NA	NA	NA	NA	NA	NA	NA	NA	NA	NA	NA	NA	67.1	11	72.4	10.1	NA	NA	NA	NA
14	Khurana et al. 2020	2020	Italy (6weeks)	Prospective interventional	Hospital based	NR	Previously TB treated woth PTLD	NR	6	NR	20	Moderate	446.66	80	472.64	91.15	NA	NA	NA	NA	NA	NA	NA	NA	NA	NA	NA	NA	NA	NA	NA	NA	52.57	22.45	34.88	16.3

## Sheet: FEV1
ID	Author_Year	Year	Country	nI	mean_b_I	sd_b_I	mean_e_I	sd_e_I
1	Silva et al.2025	2025	Brazil, Italy, France	85	1.33	0.85	1.56	0.93
4	Orooj et al.2023	2023	India	45	1.29	0.44	1.44	0.64
9	Visca et al. 2019	2019	Italy	34	1	0.72	1.133	0.73
10	Singh et al.2018	2018	India	29	1.02	0.32	1.07	0.33
11	Jones et al. 2017	2017	Uganda	29	1.4	0.54	1.42	0.54
13	Ando et al.2003	2003	Japan	32	0.84	0.29	0.86	0.087

## Sheet: FVC
ID	Author_Year	Year	Country	nI	mean_b_I	sd_b_I	mean_e_I	sd_e_I
1	Silva et al.2025	2025	Brazil, Italy, France	85	2.37	0.92	2.61	1.03
4	Orooj et al.2023	2023	India	45	1.64	0.47	1.64	0.47
9	Visca et al. 2019	2019	Italy	34	2.3	0.9	2.4	0.9
10	Singh et al.2018	2018	India	29	1.76	0.54	1.81	0.56
11	Jones et al. 2017	2017	Uganda	29	2.08	0.6	2.13	0.61
13	Ando et al.2003	2003	Japan	32	2.08	0.6	2.13	0.61

## Sheet: FEV1toFVC
ID	Author Year	Year	Country	nI	mean_b_I	sd_b_I	mean_e_I	sd_e_I
	Silva et al.2025	2025	Brazil, Italy, France	85	59.2	23.5	62.3	20.9
	Visca et al. 2019	2019	Italy	34	51.4	15.1	52.4	14.8
	Singh et al.2018	2018	India	29	60.98	16.37	60.55	15.26
	Jones et al. 2017	2017	Uganda	29	68	19	67	19

## Sheet: SGRQ
Study ID	Author_Year	Year	Country	nI	mean_b_I	sd_b_I	mean_e_I	sd_e_I
3	Mtei et al.2025	2025	Tanzania	121	34.63	17.03	12.99	9.69
5	Hussain et al.2023	2023	India	45	57.6	20.1	40.4	18.3
7	Fernandez et al. 2022	2022	Philippines	14	39	18.8	25	12.6
8	Fonseca et al.2025	2025	Brazil	23	37.5	58	22.4	48.6
9	Khurana et al. 2020	2020	Italy	20	52.57	22.45	34.88	16.3

## Sheet: PaO2
ID	Author Year	Year	Country	nI	mean_b_I	sd_b_I	mean_e_I	sd_e_I
1	Silva et al.2025	2025	Brazil, Italy, France	85	66.2	15.1	70.2	13.9
4	Orooj et al.2023	2023	India	45	100.37	16	100.37	16
13	Ando et al.2003	2003	Japan	32	78.5	9.6	79	9
14	Atsuhiko et al. 2002	2002	japan	35	67.1	11	72.4	10.1
