# Supplementary material for: Effect of pulmonary rehabilitation on lung function and quality of life in pulmonary tuberculosis survivors with post-tuberculosis lung disease: A Systematic review and meta- analysis
Source: Research Square preprint supplement (doi:10.21203/rs.3.rs-7528773/v1), 2025-10-16
Supplement: Supplementary file 3 [file 690809e216328a1737de43b9.xlsx]

## Sheet: Sheet1
Prepost study design													RCT		Cohort study
Criterion	Silva et al.2025	Fonseca et al.2025	Sinha et al.2025	Mtei et al.2025	Hussain et al.2023	Fernandez et al. 2022	Tolba et al.2021	Visca et al. 2019	Jones et al. 2017	Ando et al.2003	Atsuhiko et al. 2002	Khurana et al. 2020	Criterion	Orooj et al.2023	Criterion	Singh et al.2018
Study question/objective clearly stated	Y	Y	Y	Y	Y	Y	Y	Y	Y	Y	Y	Y	Study described as RCT	Y	Research question/objective clearly stated	Y
Eligibility/selection criteria prespecified	Y	Y	Y	Y	Y	Y	Y	Y	Y	Y	Y	Y	Method of randomization adequate	Y	Study population clearly specified and defined	Y
Participants representative of target population	Y	N	Y	Y	Y	N	N	N	N	N	N	N	Allocation concealed	Y	Participation rate ≥50%	N
All eligible participants enrolled	Y	Y	N	N	N	N	N	N	N	Y	Y	N	Participants/providers blinded	N	Subjects selected from similar populations	Y
Sample size sufficiently large	N	N	Y	Y	N	N	N	N	N	N	N	N	Outcome assessors blinded	NR	Sample size justification/power provided	N
Intervention clearly described & consistent	Y	Y	Y	Y	Y	Y	Y	Y	Y	Y	Y	Y	Groups similar at baseline	Y	Exposure measured prior to outcome	Y
Outcome measures prespecified, valid, reliable	Y	Y	Y	Y	Y	Y	Y	Y	Y	Y	Y	Y	Overall drop-out ≤20%	Y	Timeframe sufficient to observe outcome	Y
Outcome assessors blinded	NR	NR	NR	N	NR	NR	N	NR	N	N	N	NR	Differential drop-out ≤15%	Y	Different exposure levels examined	N
Loss to follow-up ≤20%	Y	Y	Y	Y	N	Y	Y	Y	Y	Y	Y	Y	High adherence to protocols	Y	Exposure measures clearly defined/valid	Y
Statistical methods examined pre–post changes	Y	Y	Y	Y	Y	Y	Y	Y	N	Y	Y	Y	Other interventions avoided or similar	Y	Exposure assessed more than once	Y
Outcome measures taken multiple times (ITS)	N	N	N	N	N	N	N	N	N	N	N	N	Outcomes assessed validly & consistently	Y	Outcome measures clearly defined/valid	Y
Group-level intervention analyzed correctly	NA	NA	NR	N	NR	NA	NA	NR	N	NA	NA	NR	Sample size sufficiently large	Y	Outcome assessors blinded	N
Over all score	0.82	0.64	0.82	0.67	0.6	0.64	0.55	0.6	0.42	0.67	0.67	0.6	Outcomes/subgroups prespecified	Y	Loss to follow-up ≤20%	Y
	High	Moderate	High	Moderate	Moderate	Moderate	Moderate	Moderate	Poor	Moderate	Moderate	Moderate	All randomized participants analyzed (ITT)	Y	Key confounders measured and adjusted	N
														o.92	0.64
														High	Poor
	Y=Yes, N=No, NA=Not applicable
