# Supplementary material for: Effect of pulmonary rehabilitation on lung function and quality of life in pulmonary tuberculosis survivors with post-tuberculosis lung disease: A Systematic review and meta- analysis
Source: Research Square preprint supplement (doi:10.21203/rs.3.rs-7528773/v1), 2025-10-16
Supplement: Supplementary file 4 [file 6f6bd26e97dc2d01da773ffe.xlsx]

## Sheet: Sheet1
Moderator	Estimate	SE	z-value	p-value	95% CI Lower	95% CI Upper	Significance
Sample size	-0.1972	0.2661	-0.7412	0.4586	-0.7189	0.3244	NS
Intervention duration	-4.3708	3.0583	-1.4291	0.153	-10.365	1.6234	NS
