# Supplementary material for: Effect of pulmonary rehabilitation on lung function and quality of life in pulmonary tuberculosis survivors with post-tuberculosis lung disease: A Systematic review and meta- analysis
Source: Research Square preprint supplement (doi:10.21203/rs.3.rs-7528773/v1), 2025-10-16
Supplement: Supplementary file 5 [file bb183bf9a473f2426a25b919.xlsx]

## Sheet: Sheet1
Test Method	Bias Estimate	SE of Bias	p-value	Interpretation
Egger’s test	-3.5984	3.892	0.377	No significant evidence of funnel plot asymmetry (p > 0.05)
Beggs Test	32	14.5831	0.0282	Suggests potential small-study effects / publication bias (p < 0.05)
